# Supplementary material for: lnc-MRGPRF-6:1 Promotes ox-LDL-Induced Macrophage Ferroptosis via Suppressing GPX4
Source: Hindawi journal article supplement (doi:10.1155/2023/5513245), 2023-08-16

A THP-1 derived macrophage

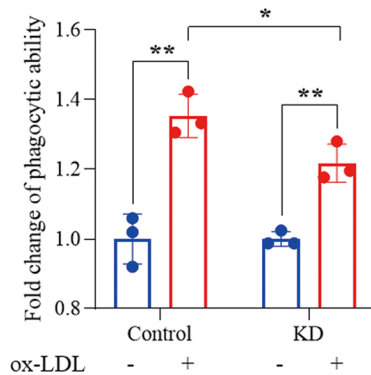

B THP-1 derived macrophage

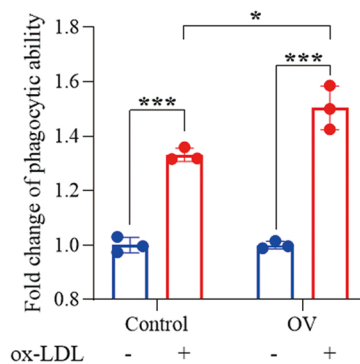

C Human monocyte derived macrophage

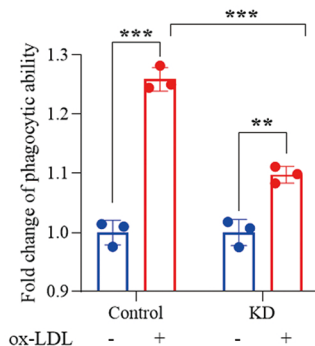

D Human monocyte derived macrophage

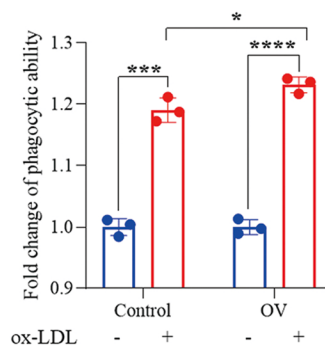

Supplement: f1 [file 5513245.f1.pdf]
