# Supplementary material for: lnc-MRGPRF-6:1 Promotes ox-LDL-Induced Macrophage Ferroptosis via Suppressing GPX4
Source: Hindawi journal article supplement (doi:10.1155/2023/5513245), 2023-08-16

# Volcano map of DEGs

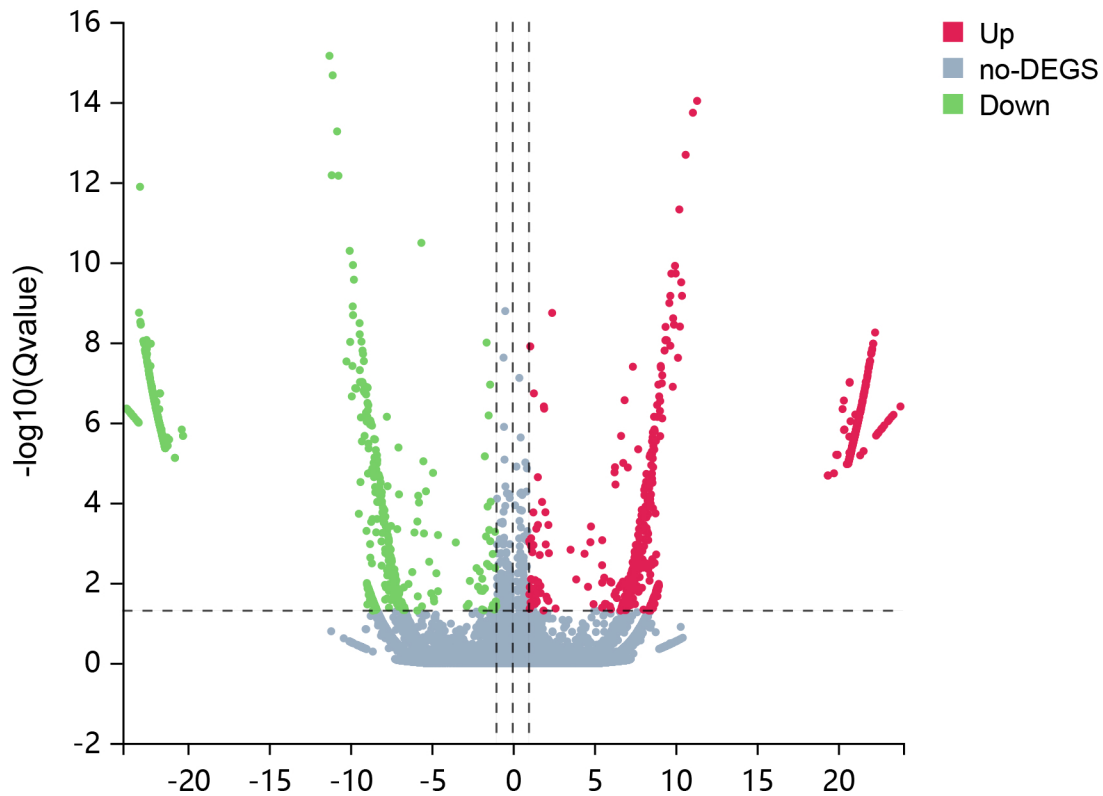

Supplement: f2 [file 5513245.f2.pdf]
